# Supplementary material
Source: Elsevier journal article supplement (https://rcastoragev2.blob.core.windows.net/5665f66c12d8a6a47ad521b0ff7a7370/mmc1.pdf)
Supplement: mmc1 [file mmc1.pdf]

## Appendix A: Search Strategy

Each of the five data bases was searched independently using the terms as shown below between 1990 and 2020. The results of the search are shown. These results may include duplicates with the other searches and with the material provided by the Vision Loss Expert Group. These duplicates and non-relevant articles were screened according to criteria as outlined in Appendix B and in the flow diagram shown in Appendix C. Data was extracted using the VLEG Excel format shown in Appendix D.

### PubMed

```
(((((("Prevalence"[Mesh] OR "epidemiology" [Subheading] OR "Cross-Sectional Studies"[Mesh] OR prevalen* [tiab])) AND (("Corneal Diseases"[Mesh] OR ("Eye Injuries"[Mesh:NoExp] OR "Eye Burns"[Mesh] OR "Eye Foreign Bodies"[Mesh] OR "Eye Injuries, Penetrating"[Mesh] OR "eye injuries" OR "eye injury") AND ("Cornea"[Mesh] OR cornea* [tiab])) OR "corneal disease" OR "corneal diseases" OR "corneal dystrophy" OR "corneal dystrophies" OR "corneal trauma")))) AND (("Blindness"[Mesh] OR "Vision, Low"[Mesh] "low vision" OR "reduced vision" OR "vision reduction" OR "diminished vision" OR "subnormal vision" OR "blind" [tiab] OR blindness [tiab] OR "vision impairment" OR "impaired vision" OR "visual impairment" OR "sight threatening" OR "vision threatening" OR "vision loss" OR "loss of vision"))))
```

Searched 12/8/2020

795 results

### Embase

| No. | Query                                                                                                                                                                                                  | Results          |
|-----|--------------------------------------------------------------------------------------------------------------------------------------------------------------------------------------------------------|------------------|
| #5  | #1 AND #2 AND #3 AND [1990-2020]/py                                                                                                                                                                    | <b>1,816</b>     |
| #4  | #1 AND #2 AND #3                                                                                                                                                                                       | <b>2,200</b>     |
| #3  | 'blindness'/exp OR 'visual impairment'/exp OR blindness:ti,ab OR (vision NEAR/3 (reduc* OR low OR diminish* OR subnormal OR impair* OR loss)):ti,ab OR blind:ti,ab OR (sight NEAR/3 threatening):ti,ab | <b>442,205</b>   |
| #2  | 'Cornea disease'/exp OR ('eye injury'/exp OR (eye NEAR/3 (injur* OR trauma)):ti,ab AND ('cornea'/exp OR cornea*:ti,ab)) OR (corneal NEAR/3 (diseas* OR dystroph* OR trauma)):ti,ab                     | <b>106,891</b>   |
| #1  | 'prevalence'/exp OR 'cross-sectional study'/exp OR 'epidemiology'/exp OR prevalen*:ti,ab                                                                                                               | <b>5,629,354</b> |

Searched 1/4/2021

1,816 results

### Web of Science

TS = ((prevalen\* OR epidemiol\* OR "cross-sectional study" OR "cross-sectional studies")) AND  
TS = ((cornea\* NEAR/3 diseas\*) OR (cornea\* NEAR/3 dystroph\*) OR (cornea\* NEAR/3 trauma\*))  
AND TS = ((blindness OR blind OR (visual NEAR/3 impair\*) OR (vision NEAR/3 reduc\*) OR (vision  
NEAR/3 low) OR (vision NEAR/3 impair\*) OR (vision NEAR/3 diminish\*) OR (vision NEAR/3  
subnormal) OR (vision NEAR/3 loss) OR (sight NEAR/3 threatening)))

*Indexes=SCI-EXPANDED, SSCI, A&HCI, CPCI-S, CPCI-SSH, BKCI-S, BKCI-SSH, ESCI, CCR-EXPANDED,  
IC Timespan=1990-2020*

Searched 1/4/2021

148 results

### Scopus

(TITLE-ABS-KEY(prevalen\* OR epidemiol\* OR "cross-sectional study" OR "cross-sectional  
studies")) AND (TITLE-ABS-KEY((cornea\* W/3 diseas\*) OR (cornea\* W/3 dystroph\*) OR (cornea\*  
W/3 trauma\*))) AND ((TITLE-ABS-KEY(blindness OR blind OR (visual W/3 impair\*) OR (vision  
W/3 reduc\*) OR (vision W/3 low)) OR TITLE-ABS-KEY((vision W/3 impair\*) OR (vision W/3  
diminish\*) OR (vision W/3 subnormal))OR TITLE-ABS-KEY((vision W/3 loss) OR (sight W/3  
threatening))))

Searched 1/4/2021

368 results

### Cochrane

Search Name: Corneal blindness prevalence

Description:

- | ID  | Search                                                         |
|-----|----------------------------------------------------------------|
| #1  | MeSH descriptor: [Prevalence] explode all trees                |
| #2  | MeSH descriptor: [Cross-Sectional Studies] explode all trees   |
| #3  | prevalen* or epidemiol*                                        |
| #4  | #1 or #2 or #3                                                 |
| #5  | MeSH descriptor: [Corneal Diseases] explode all trees          |
| #6  | MeSH descriptor: [Eye Injuries] explode all trees              |
| #7  | MeSH descriptor: [Eye Burns] explode all trees                 |
| #8  | MeSH descriptor: [Eye Injuries, Penetrating] explode all trees |
| #9  | eye near/3 (injur* or trauma*)                                 |
| #10 | #6 or #7 or #8 or #9                                           |
| #11 | MeSH descriptor: [Cornea] explode all trees                    |
| #12 | cornea*                                                        |
| #13 | #11 or #12                                                     |
| #14 | #10 and #13                                                    |
| #15 | cornea* near/3 (diseas* or dystroph* or trauma*)               |
| #16 | #5 or #14 or #15                                               |
| #17 | MeSH descriptor: [Blindness] explode all trees                 |

- #18 MeSH descriptor: [Vision Disorders] explode all trees
- #19 MeSH descriptor: [Vision, Low] explode all trees
- #20 (vision near/3 (low or reduc\* or diminish\* or subnormal or impair\* or loss)) or blind or blindness or (sight near/3 threatening)
- #21 #17 or #18 or #19 or #20
- #22 #4 and #16 and #21

Searched 2/16/2021

101 results
